# Supplementary figures and images for: Grid1 Regulates the Onset of Puberty in Female Rats
Source: Research Square preprint supplement (doi:10.21203/rs.3.rs-134074/v1), 2020-12-29

Supplementary Figure 2


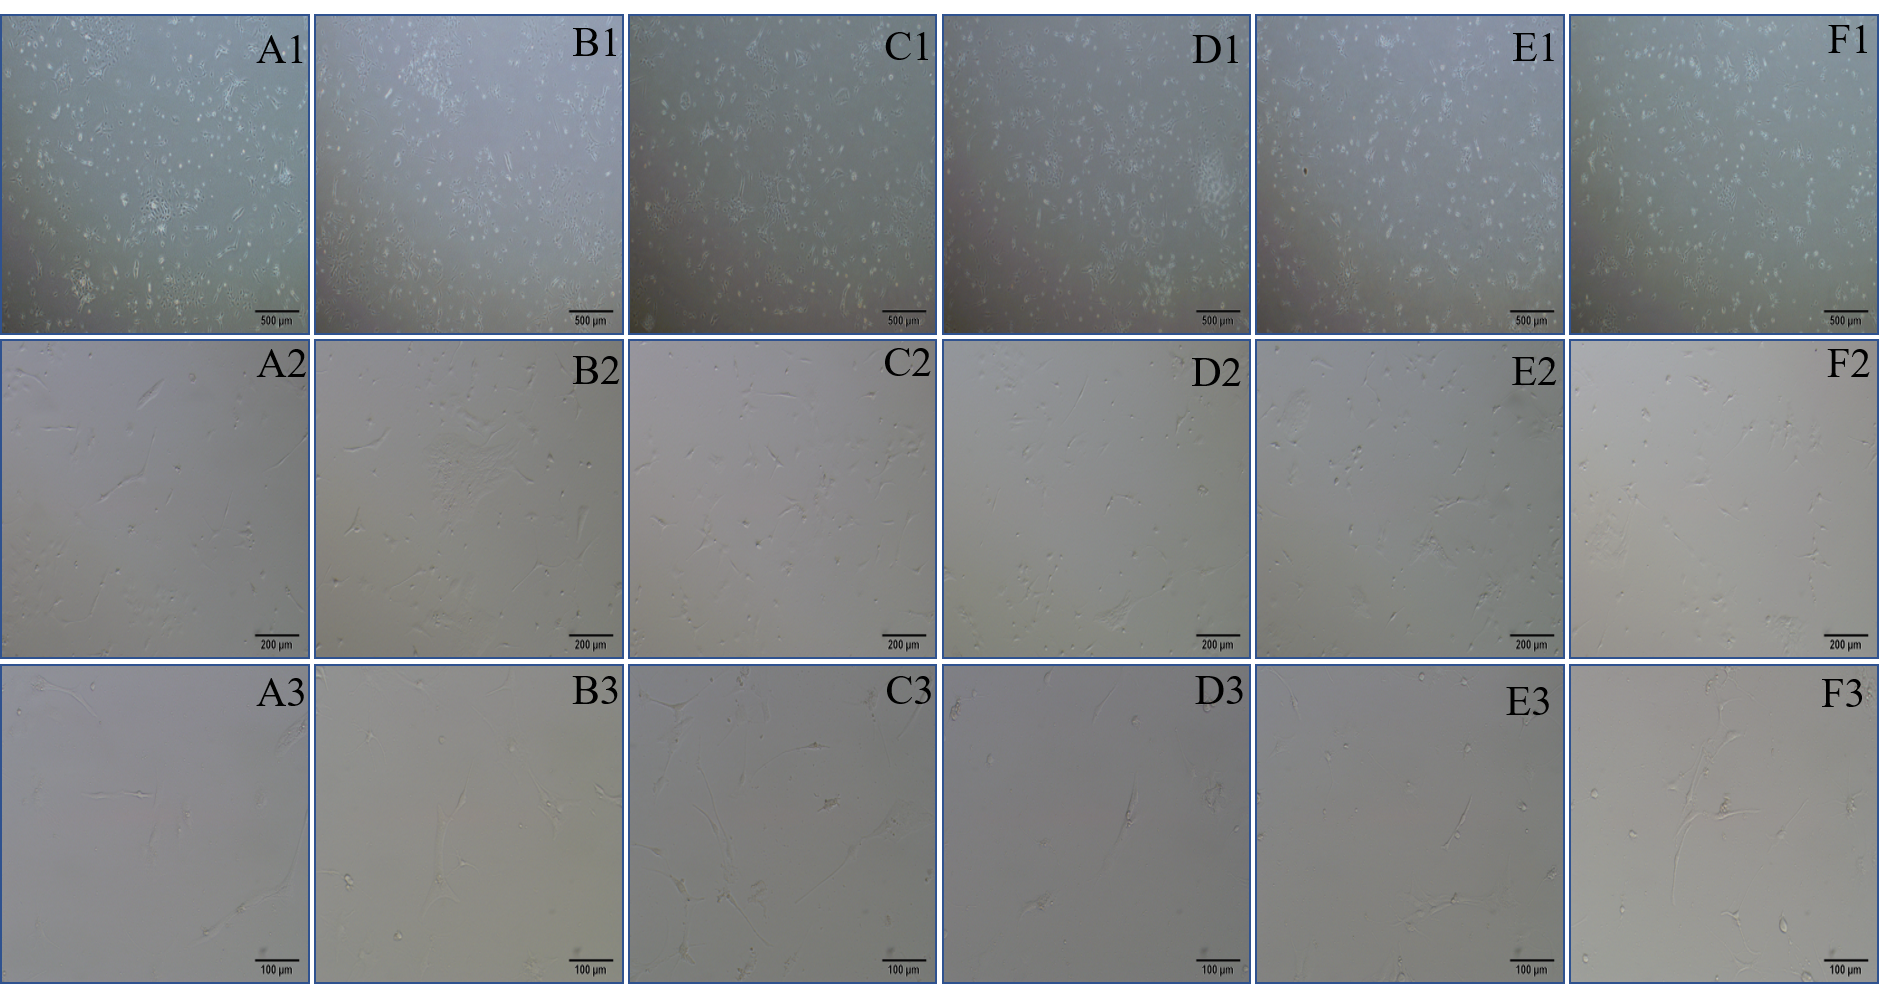

Supplement: Supplementary file 1 [file ee3b3505100f7a6fdc9e7c10.docx]
